# Supplementary material for: Expression and prognostic value of EGF-like domain multiple 6 in uterine corpus endometrial carcinoma and its correlation with immune cell infiltration
Source: Research Square preprint supplement (doi:10.21203/rs.3.rs-5962280/v1), 2025-04-17
Supplement: Supplementary file 1 [file 96231c3536dc6e973c089436.docx]

**Supplementary data**

**Supplementary Figure 1.**

**
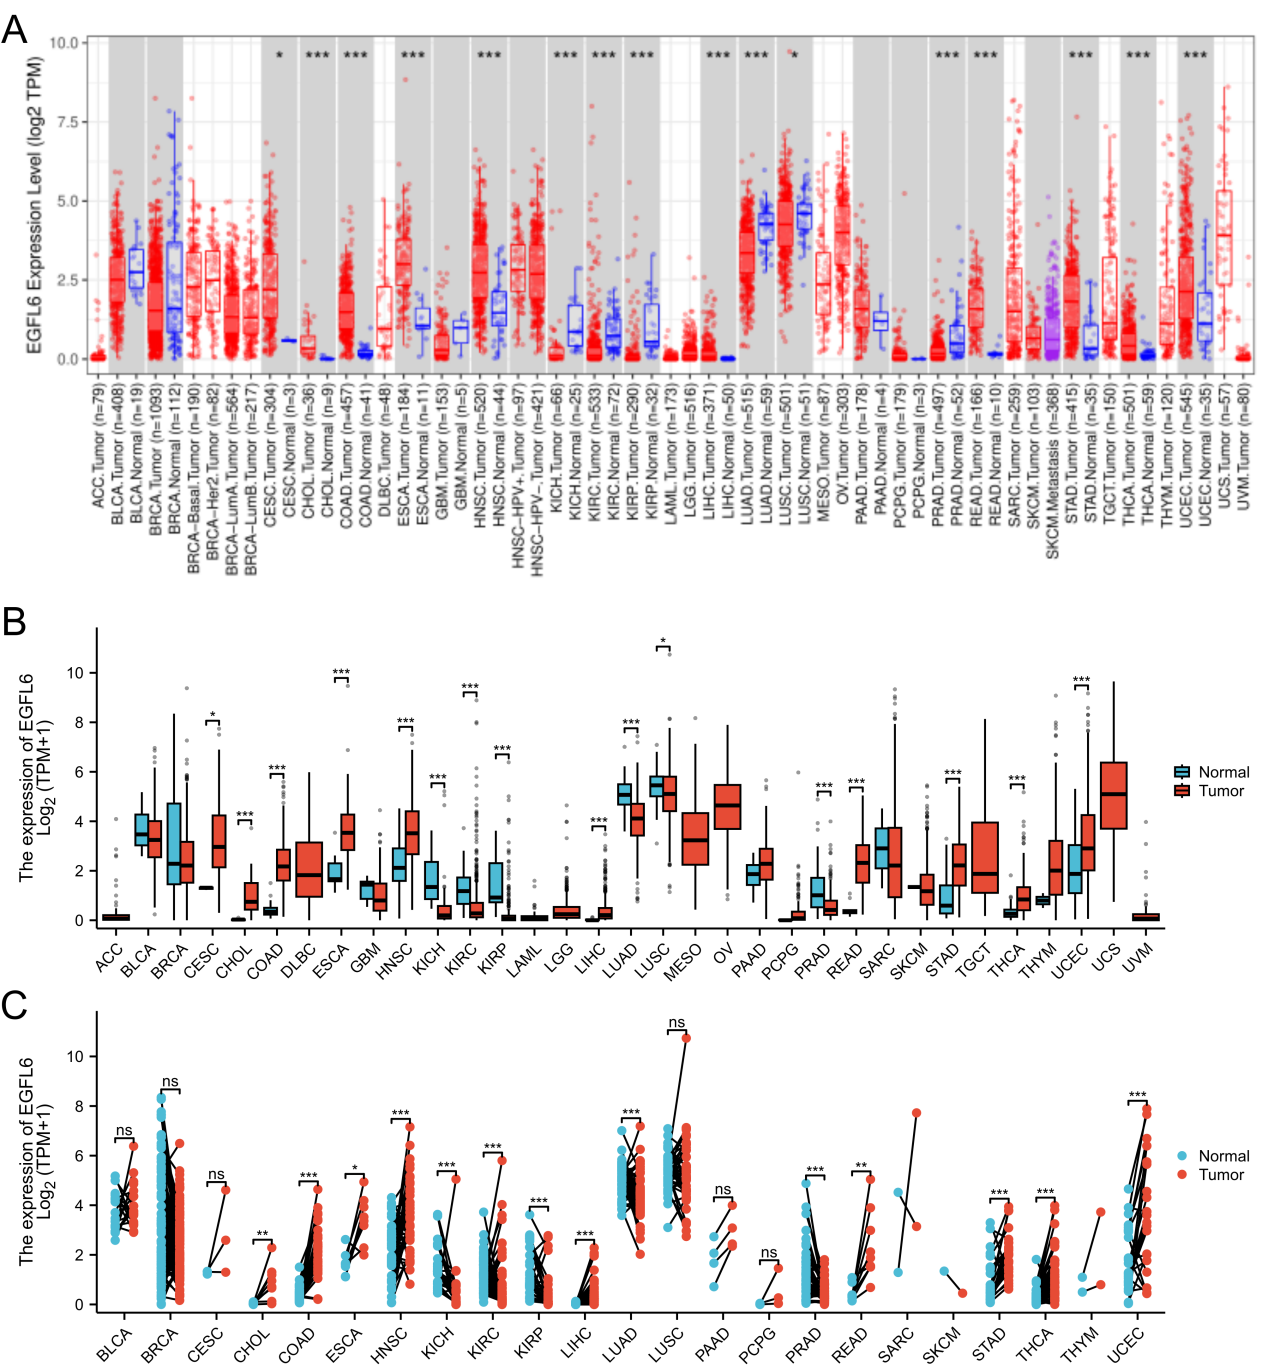
**

**Supplementary figure 1.** The expression of EGFL6 in different types of cancer. (A) EGFL6 expression data in TIMER2.0 database. (B) Comparison of EGFL6 expression levels across 33 different cancer types. (C) EGFL6 expression levels in 16 paired cancer types.

**Supplementary figure 2.**


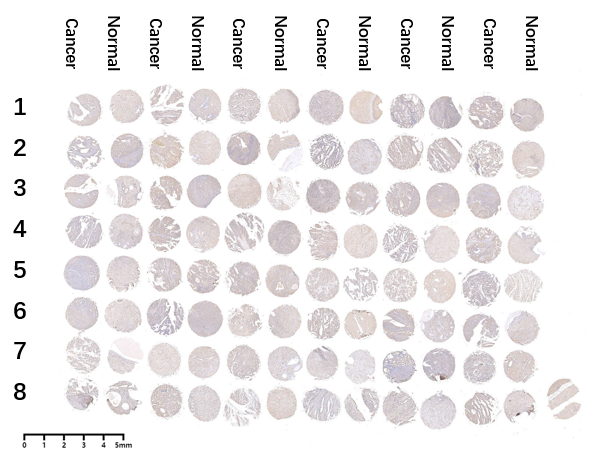


**Supplementary figure 2.** Tissue microarray analysis of EGFL6 expression in UCEC.

**Supplementary Figure 3.**


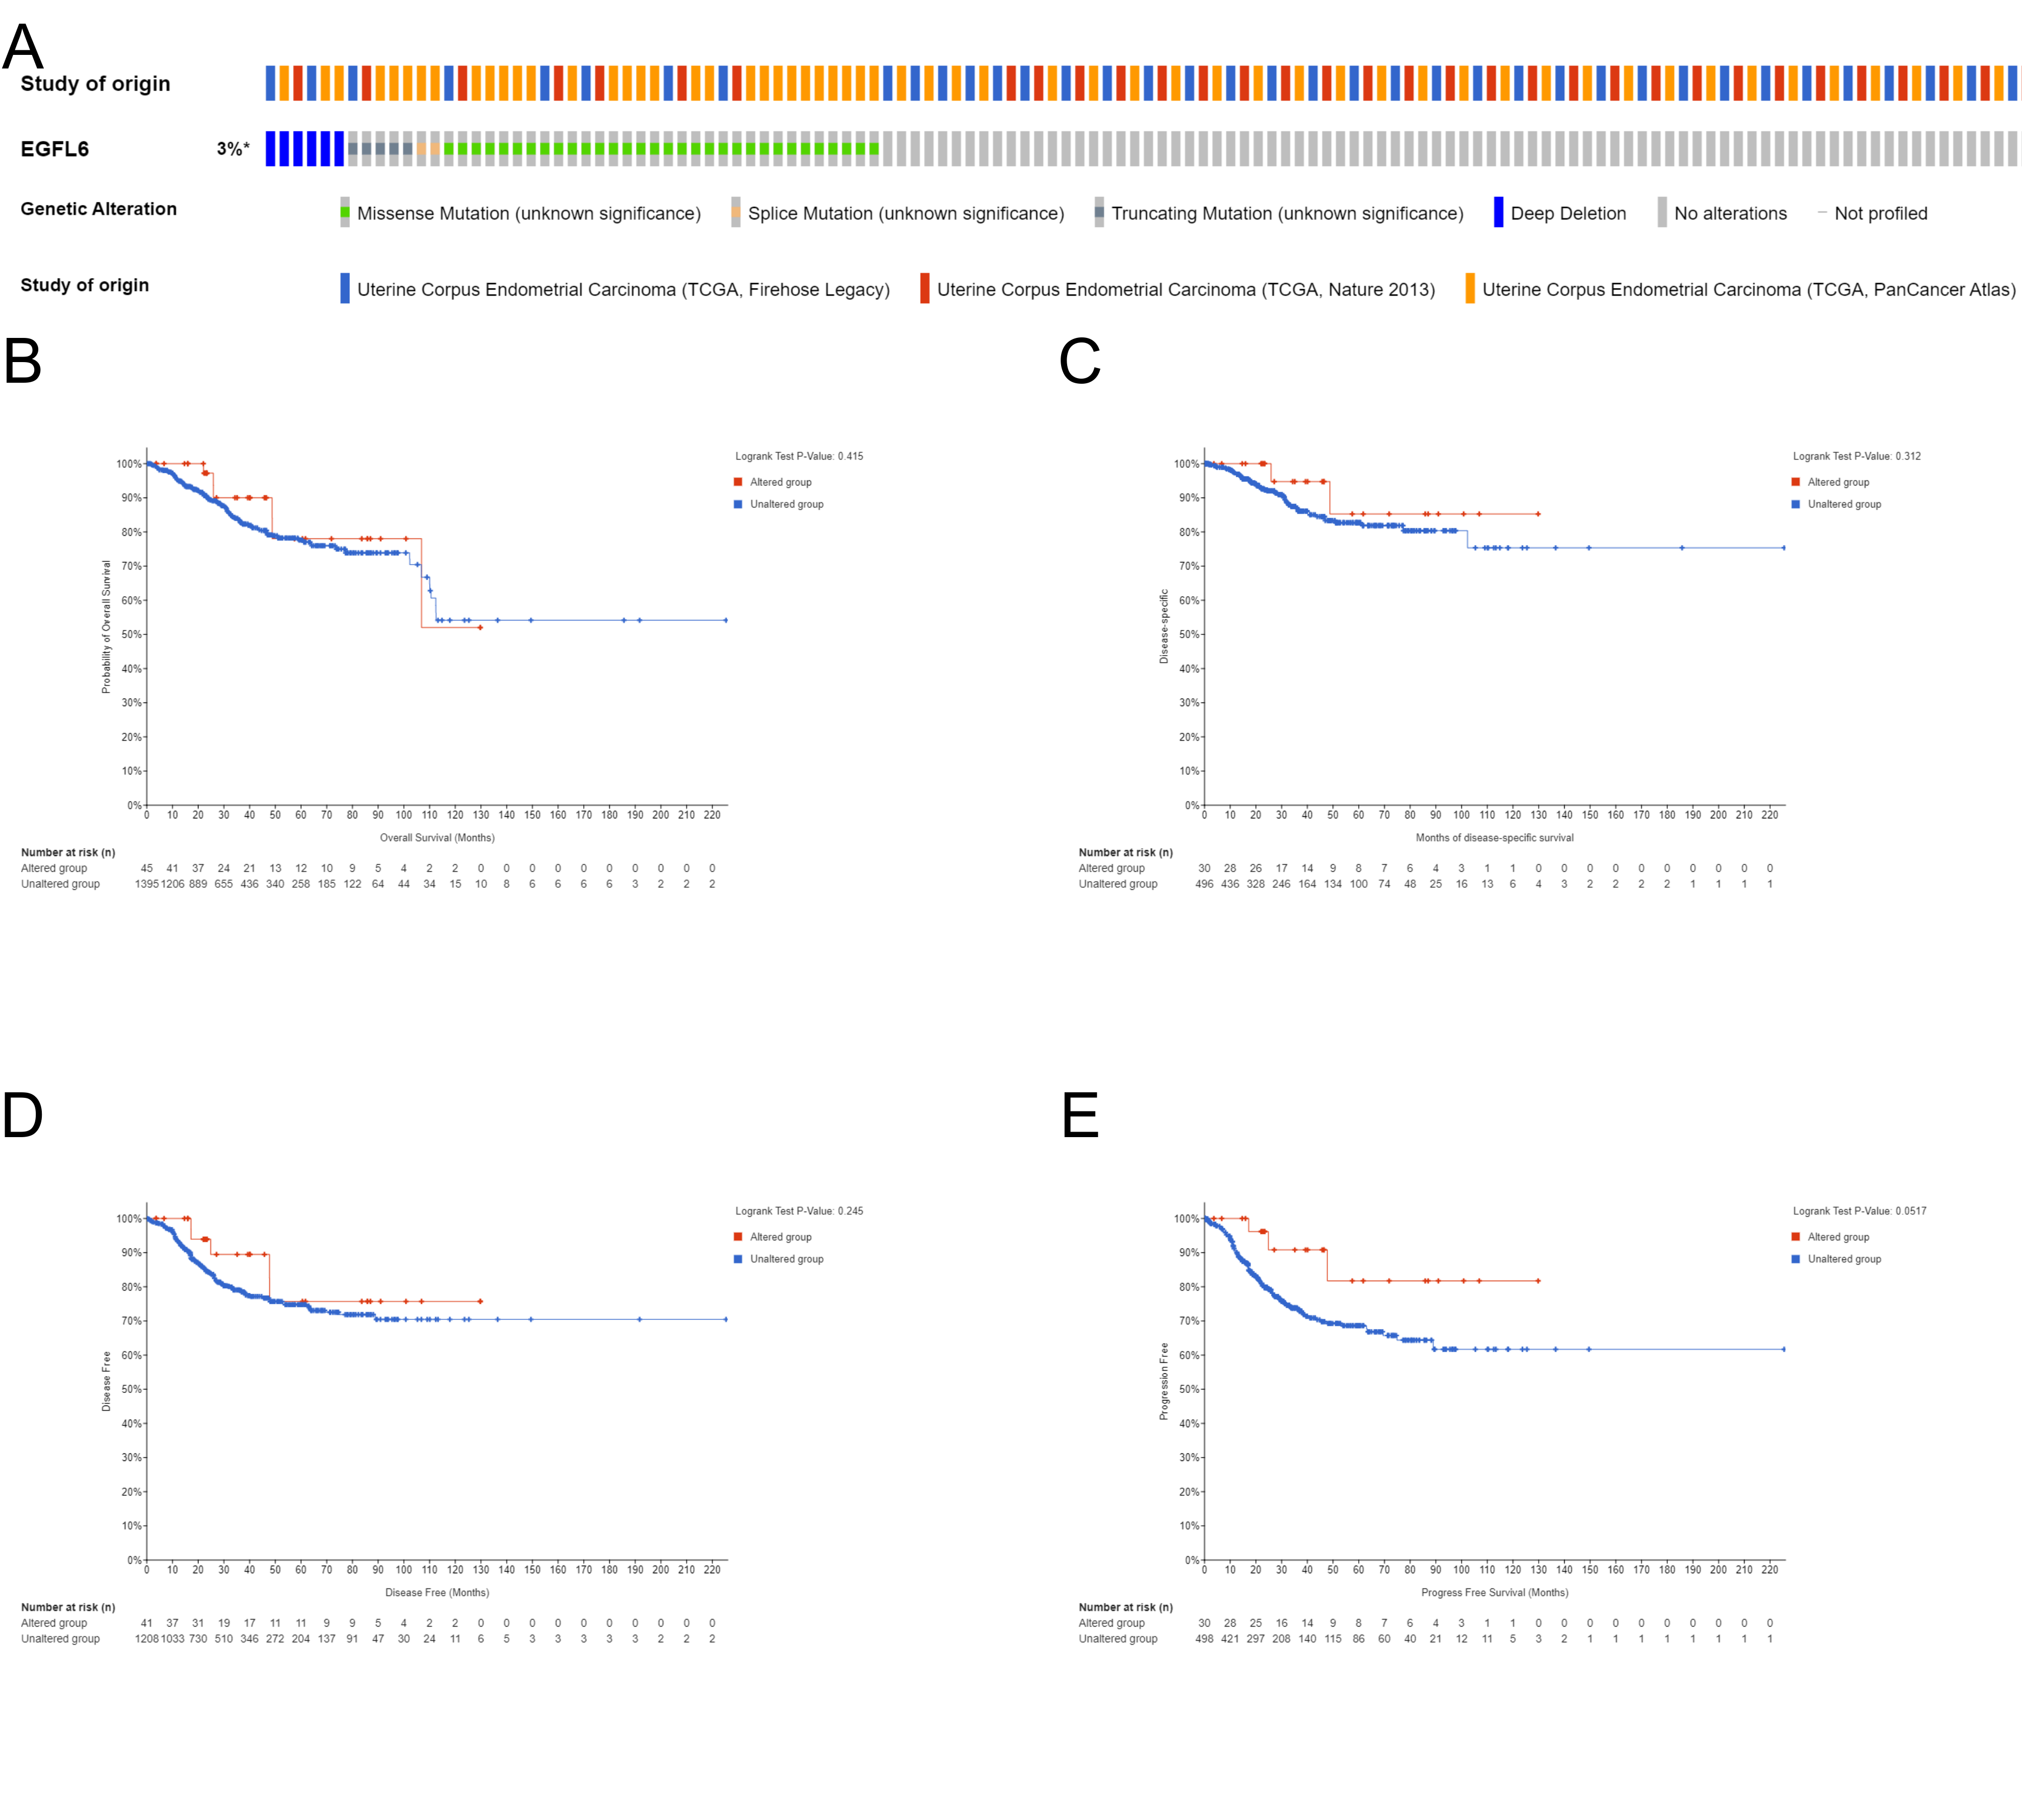


**Supplementary figure 3.** Analysis of EGFL6 mutation in UCEC. (A) The mutation profile of EGFL6 in UCEC. (B) Evaluation of Overall Survival (OS) in relation to the mutation status of EGFL6. (C) Assessment of Disease-Specific Survival (DSS) with respect to EGFL6 mutation status. (D) Analysis of Disease-Free Survival (DFS) in correlation with the mutation status of EGFL6. (E) Examination of Progression-Free Interval (PFI) associated with mutations in EGFL6.

**Supplementary Figure 4.**


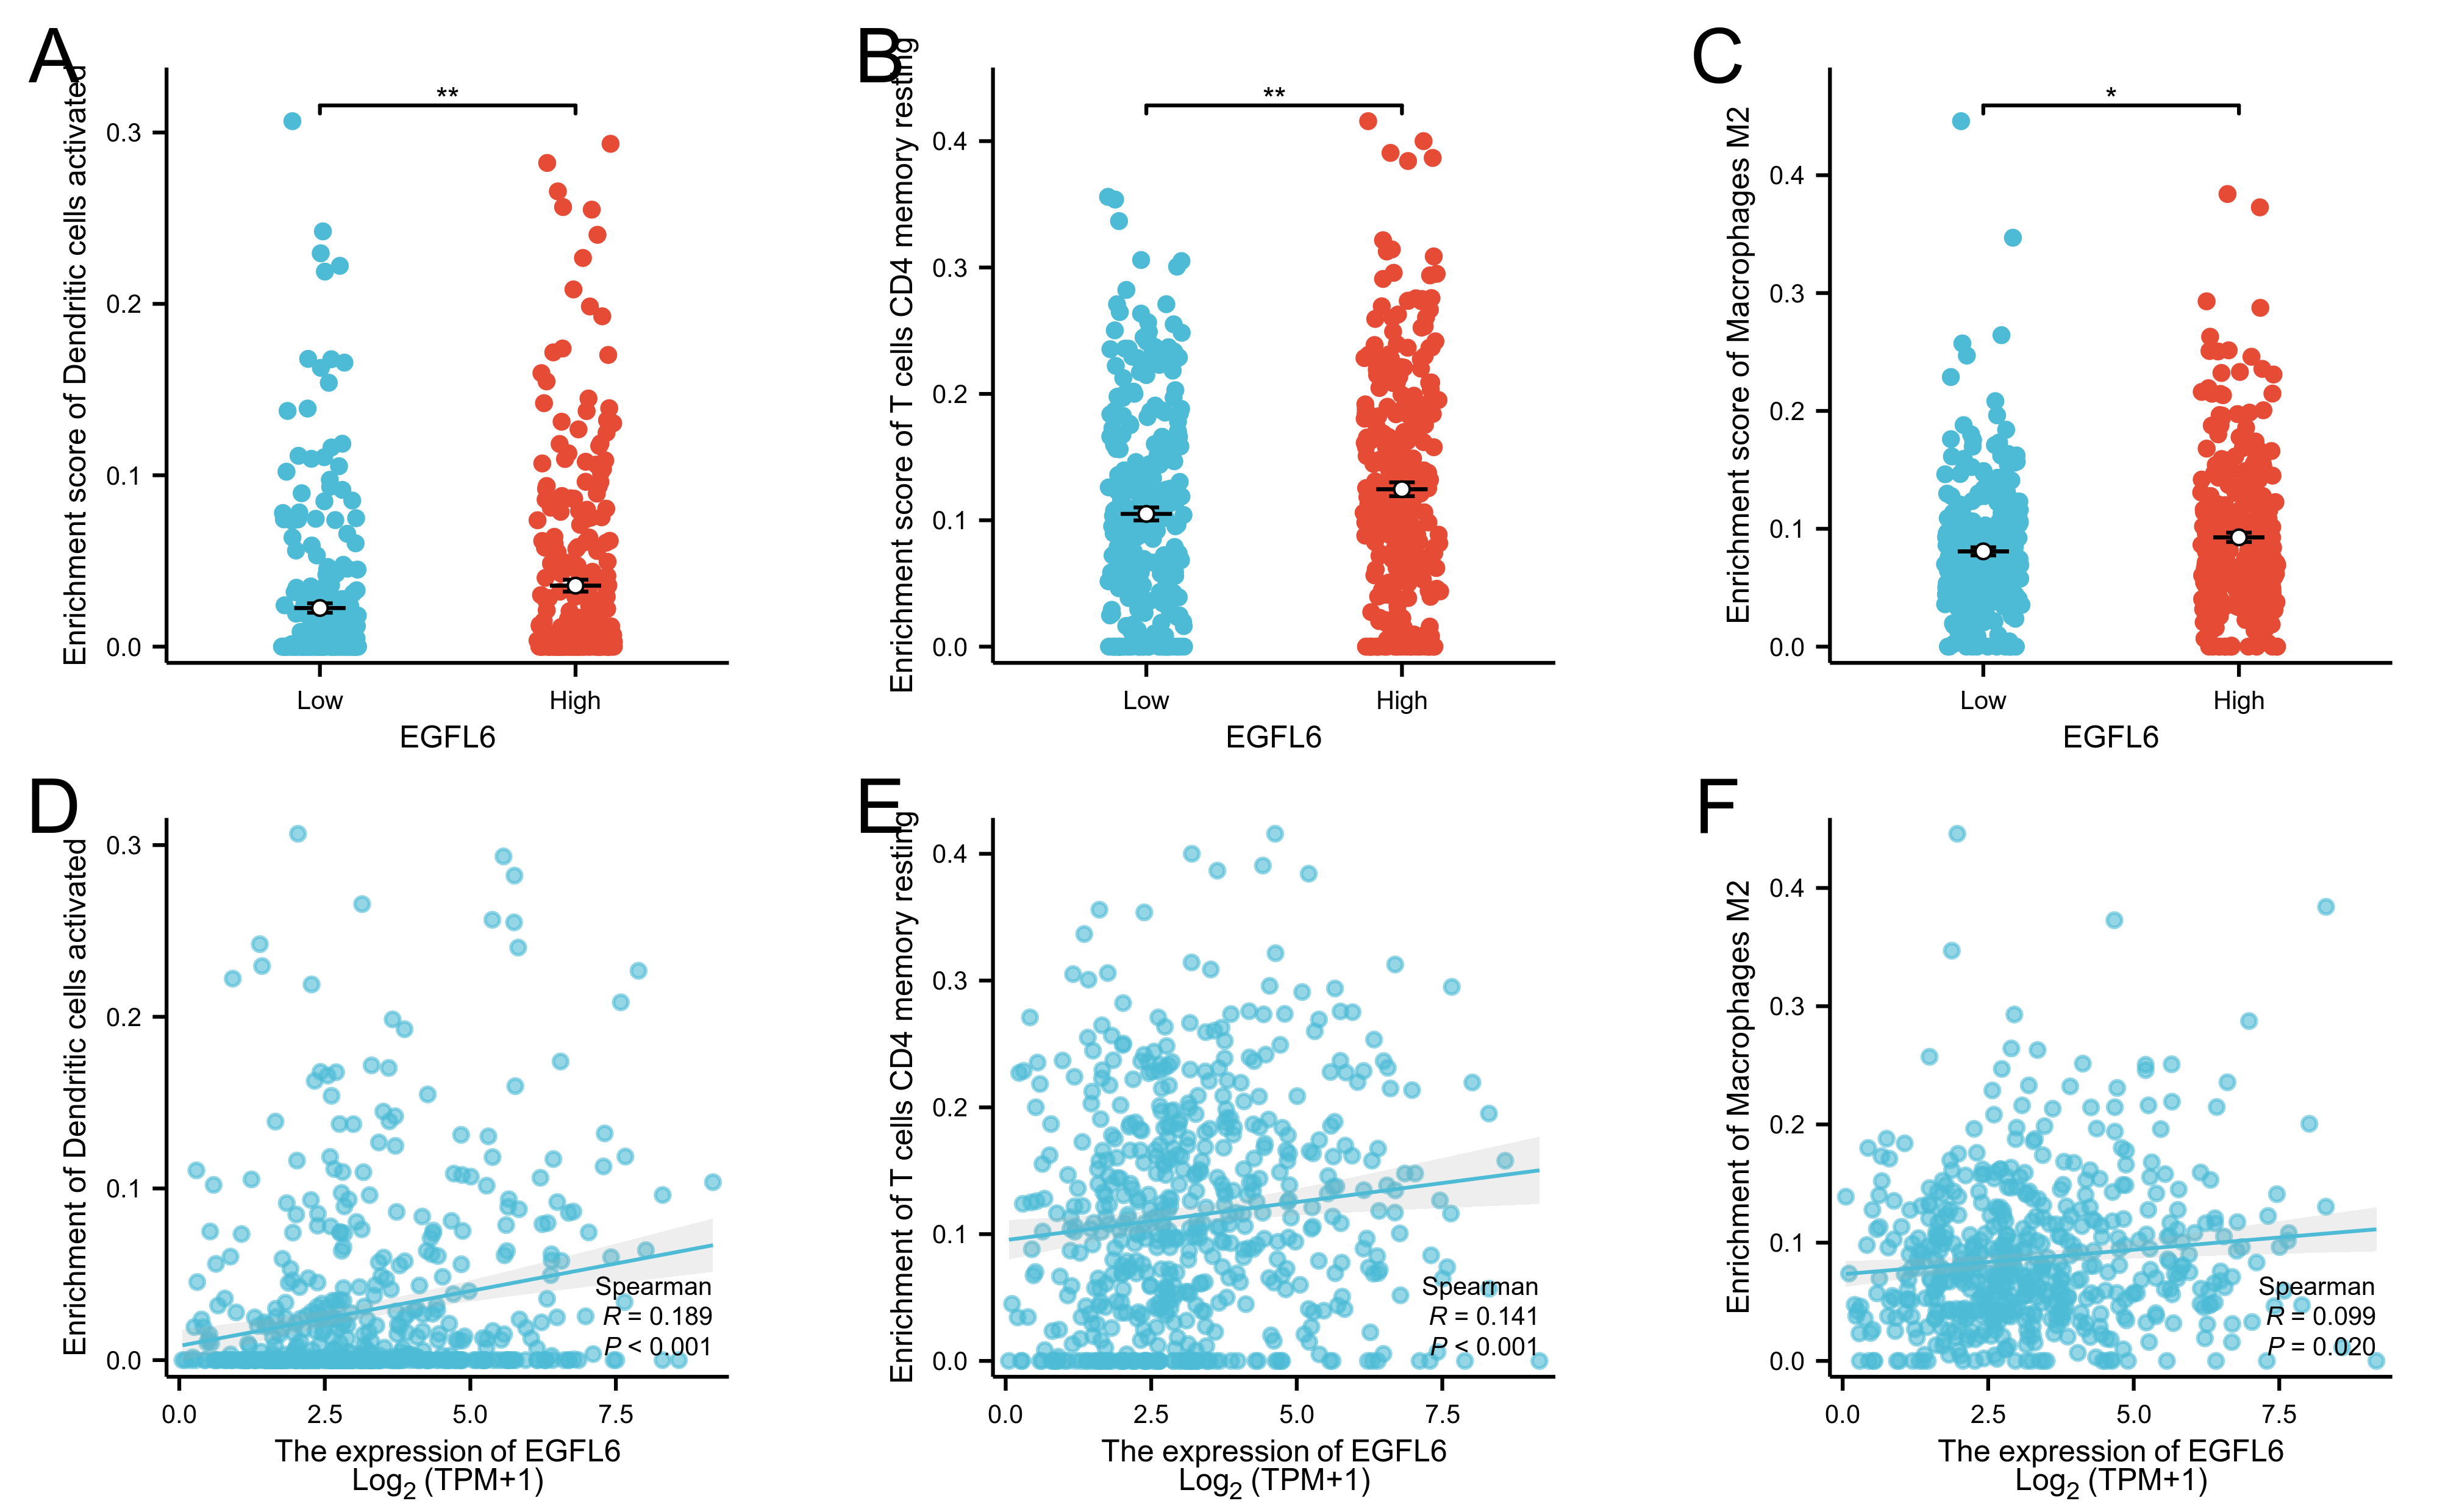


**Supplementary figure 4.** Immune infiltration analysis of EGFL6 expression in UCEC across various immune cell types. (A) Activated dendric cells. (B) CD4+ T cells (resting). (C) M2 macrophages. (D) Relationship between EGFL6 and activated dendric cells. (E) Correlation between EGFL6 expression and resting CD4 memory T cells. (F) Association between EGFL6 expression and M2 macrophages.

**Supplementary Figure 5.**

**
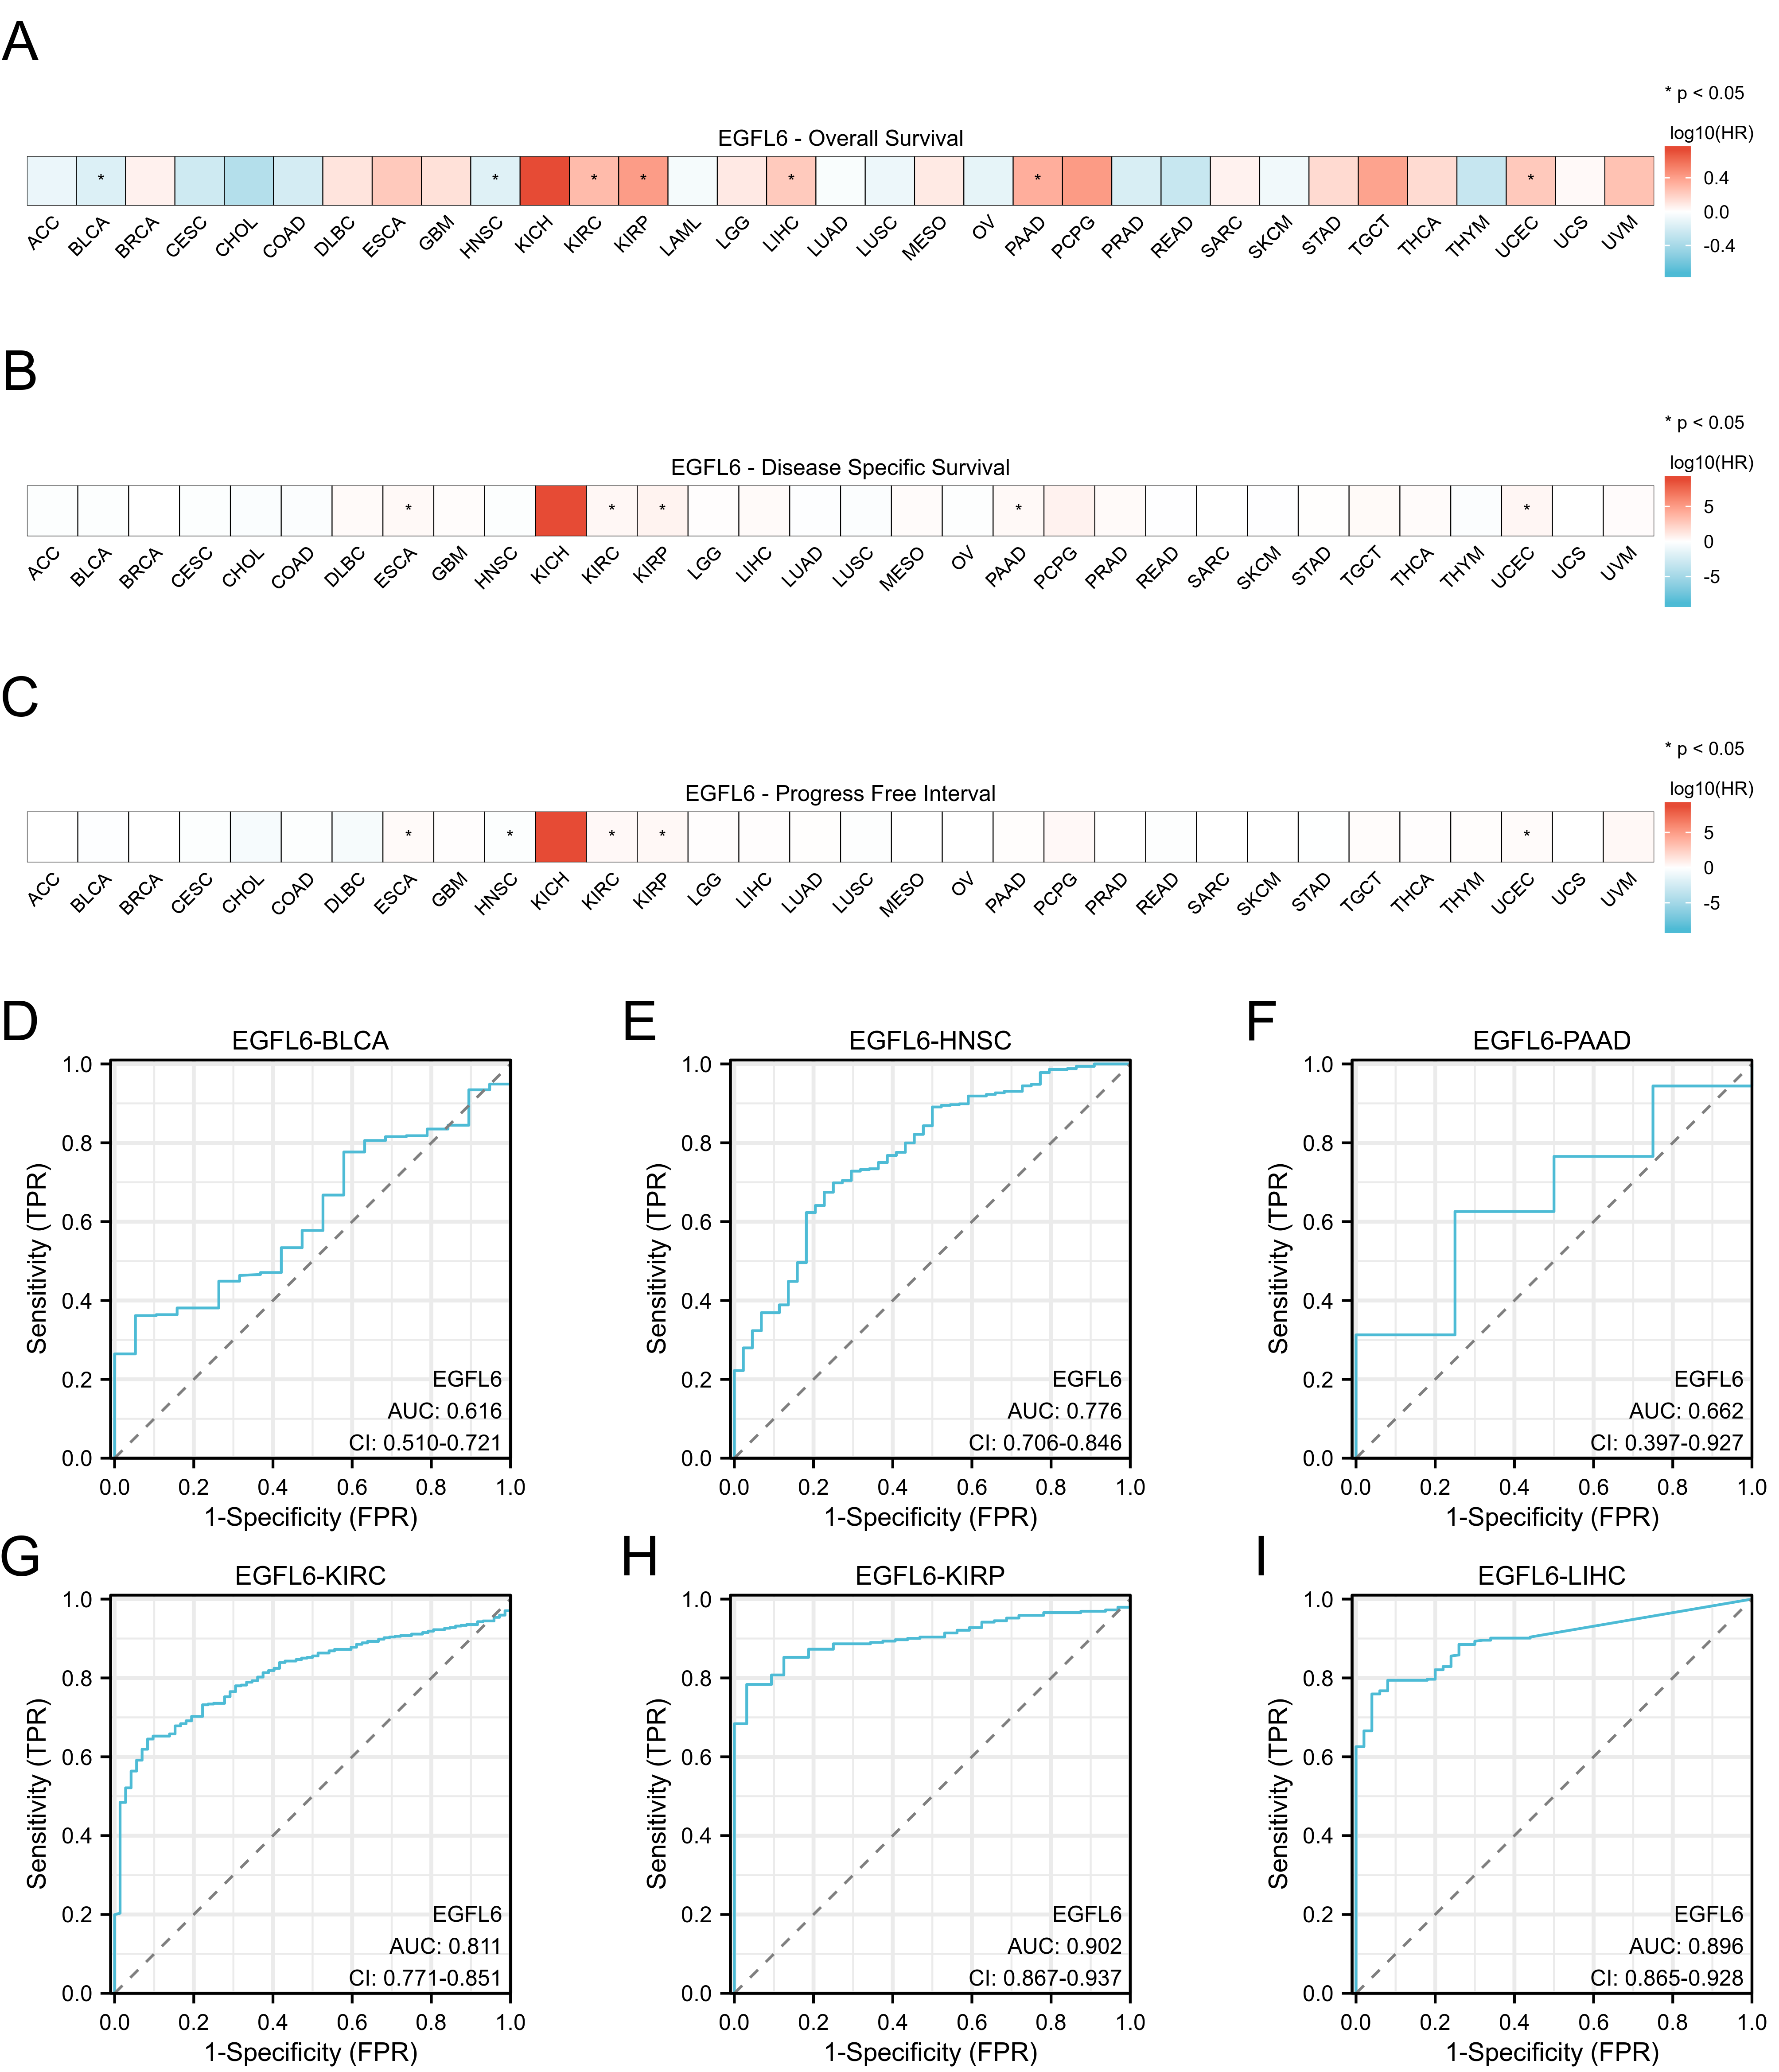
**

**Supplementary Figure 5. The relationship between the expression levels EGFL6 expression and unfavorable prognosis across various types of cancer.** (A) Analysis of overall survival. (B) Analysis of disease specific survival. (C) Analysis of progression free interval. (D) ROC curve for EGFL6 in BLCA. (E) ROC curve for EGFL6 in HNSC. (F) ROC curve for EGFL6 in PAAD. (G) ROC curve for EGFL6 in KIRC. (H) ROC curve for EGFL6 in KIRP. (I) ROC curve for EGFL6 in LIHC.

**Supplementary Table 1a.** U**nivariate and multivariate Cox regression analysis of EGFL6 in OS in UCEC.**

| Characteristics | Total | Univariate | | Multivariate | |
| --- | --- | --- | --- | --- | --- |
| HR (95% CI) | P | HR (95% CI) | P |
| Clinical stage | 553 | 8.082 (4.497 - 14.524) | **< 0.001** | 2.840 (0.775 - 10.409) | 0.115 |
| Age | 551 | 1.850 (1.162 - 2.944) | **0.009** | 1.863 (0.865 - 4.010) | 0.112 |
| Primary therapy outcome | 482 | 0.110 (0.060 - 0.204) | **< 0.001** | 0.233 (0.072 - 0.753) | **0.015** |
| Residual tumor | 414 | 5.547 (2.889 - 10.649) | **< 0.001** | 1.900 (0.575 - 6.277) | 0.292 |
| Histological type | 553 | 0.379 (0.252 - 0.571) | **< 0.001** | 0.633 (0.282 - 1.419) | 0.267 |
| Histologic grade | 542 | 13.303 (3.262 - 54.242) | **< 0.001** | 8.741 (1.109 - 68.869) | **0.040** |
| Radiation therapy | 529 | 0.596 (0.387 - 0.919) | **0.019** | 0.393 (0.197 - 0.785) | **0.008** |
| Tumor invasion(%) | 475 | 2.825 (1.752 - 4.554) | **< 0.001** | 1.215 (0.597 - 2.472) | 0.591 |
| EGFL6 | 553 | 1.187 (1.062 - 1.326) | **0.002** | 0.896 (0.738 - 1.089) | 0.271 |

**Supplementary Table 1b.** U**nivariate and multivariate Cox rtegression analysis of EGFL6 in DSS in UCEC.**

| Characteristics | Total | Univariate | | Multivariate | |
| --- | --- | --- | --- | --- | --- |
| HR (95% CI) | P | HR (95% CI) | P |
| Age | 549 | 1.217 (0.725 - 2.045) | 0.457 |  |  |
| Clinical stage | 551 | 16.848 (8.290 - 34.238) | **< 0.001** | 3.882 (0.723 - 20.839) | 0.114 |
| Primary therapy outcome | 482 | 0.062 (0.032 - 0.120) | **< 0.001** | 0.114 (0.029 - 0.441) | **0.002** |
| Histological type | 551 | 0.279 (0.170 - 0.459) | **< 0.001** | 0.451 (0.176 - 1.159) | 0.098 |
| Residual tumor | 414 | 9.474 (4.744 - 18.921) | **< 0.001** | 2.531 (0.642 - 9.979) | 0.185 |
| Tumor invasion(%) | 475 | 3.296 (1.808 - 6.011) | **< 0.001** | 0.793 (0.302 - 2.087) | 0.639 |
| Radiation therapy | 527 | 0.601 (0.353 - 1.026) | 0.062 | 0.329 (0.124 - 0.871) | **0.025** |
| EGFL6 | 551 | 1.253 (1.099 - 1.429) | **< 0.001** | 0.928 (0.728 - 1.183) | 0.546 |

**Supplementary Table 1c.** U**nivariate and multivariate Cox regression analysis of EGFL6 in PFI in UCEC.**

| Characteristics | Total | Univariate | | Multivariate | |
| --- | --- | --- | --- | --- | --- |
| HR (95% CI) | P | HR (95% CI) | P |
| Age | 551 | 1.356 (0.936 - 1.966) | 0.107 |  |  |
| Clinical stage | 553 | 6.852 (4.093 - 11.471) | **< 0.001** | 5.073 (1.829 - 14.068) | **0.002** |
| Primary therapy outcome | 482 | 0.059 (0.035 - 0.098) | **< 0.001** | 0.064 (0.023 - 0.176) | **< 0.001** |
| Histological type | 553 | 0.472 (0.332 - 0.672) | **< 0.001** | 0.291 (0.147 - 0.575) | **< 0.001** |
| Residual tumor | 414 | 5.235 (2.835 - 9.669) | **< 0.001** | 0.713 (0.234 - 2.170) | 0.552 |
| Tumor invasion(%) | 475 | 1.897 (1.298 - 2.773) | **< 0.001** | 1.265 (0.699 - 2.290) | 0.437 |
| Radiation therapy | 529 | 1.102 (0.776 - 1.566) | 0.588 |  |  |
| Histologic grade | 542 | 3.304 (1.720 - 6.345) | **< 0.001** | 1.273 (0.446 - 3.636) | 0.652 |
| EGFL6 | 553 | 1.087 (0.986 - 1.197) | 0.093 | 0.851 (0.721 - 1.005) | 0.057 |
